# The American Journal of Psychiatry

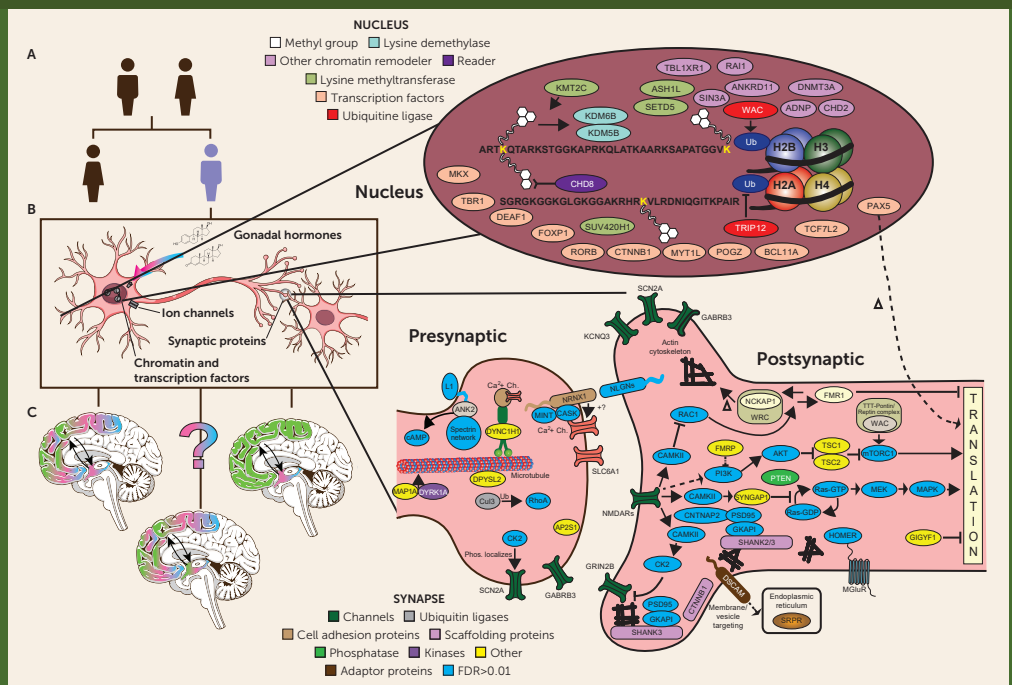

Autism Spectrum Disorder Genetics and the Search for Pathological Mechanisms

Treatment-Specific Associations Between Brain Activation and Symptom Reduction in OCD Following CBT

Antibodies From Children With PANDAS Bind Specifically to Striatal Cholinergic Interneurons and Alter Their Activity

A Genetics-First Approach to Dissecting the Heterogeneity of Autism
